# Supplementary material for: A combination of hepatic leukemia factor and circulating tumor cells serve as effective biomarkers for lung adenocarcinoma prognosis
Source: PeerJ. 2025 Mar 18;13:e19092. doi: 10.7717/peerj.19092 (PMC11927566; doi:10.7717/peerj.19092)
Supplement: Supplemental Information 4 [file peerj-13-19092-s004.xlsx]

## Sheet: Sheet1
PID	Age	Gender	Pathological pattern	Grade	T class	N class	M class	Clinical stage	EGFR	OS_s	OS_t	PFS_s	PFS_t	LRFS_s	LRFS_t	DMFS_s	DMFS_t	HLF	CTCs		SI	HLF				L	H		Chi-square	P value
P021	66	male	ADC	G3	T3	N0	M0	S2	Mut	0	47.2	1	21.6	1	21.6	0	47.2	0	5		0	62		Age	<=60	49	72	343	4.673	0.031		121	35.277
P026	49	female	ADC	G2	T1	N0	M0	S1	Mut	0	50.9	0	50.9	0	50.9	0	50.9	0	3		1	10			>60	117	105					222	64.723
P029	75	female	ADC	G2	T2	N0	M1	S4	Mut	0	50.2	0	50.2					0	7		2	24		Gender	female	90	91	343	0.27	0.603		181	52.7697
P032	67	female	ADC	G2	T2	N2	M0	S3	Mut	0	50.1	0	50.1	0	50.1	0	50.1	0	9		3	31			male	76	86					162	47.2303
P034	56	female	ADC	G3	T1	N0	M0	S1	Mut	0	57	1	56.8	0	57	1	56.8	0	3		4	39		Pathological pattern	G1	15	27	343				42	12.2449
P048	56	female	ADC	G2	T1	N0	M0	S1	Mut	0	46.2	0	46.2	0	46.2	0	46.2	0	2		6	78			G2	91	109					200	58.309
P057	53	female	ADC	G2	T1	N0	M0	S1	Mut	0	52.3	1	31.8	0	52.3	1	31.8	0	3		8	17			G3	60	41					101	29.4461
P063	64	male	ADC	G3	T3	N0	M0	S2	Mut	0	54.8	1	9.9	1	9.9	0	54.8	0	14		9	53			G1-2	106	136	343	6.948	0.008
P074	70	female	ADC	G2	T2	N0	M0	S1	Mut	0	47.4	1	11.5	1	23.5	1	11.5	0	4		12	29			G3	60	41
P081	56	female	ADC	G2	T2	N1	M0	S2	Mut	0	35.5	1	35.4	1	35.4	1	35.4	0	5		16	0		T class	T1	50	83	343				133	38.7755
P100	48	female	ADC	G2	T3	N1	M0	S3	Mut	0	50.6	1	38.3	1	38.3	1	40.3	0	6			343			T2	78	75					153	44.6064
P104	50	female	ADC	G2	T1	N0	M0	S1	Mut	0	10	1	10	1	10	0	10	0	4						T3	24	12					36	10.4956
P117	72	female	ADC	G2	T3	N2	M0	S3	Mut	0	44.6	0	44.6	0	44.6	0	44.6	0	5						T4	9	7					16	4.66472
P120	65	male	ADC	G2	T1	N0	M0	S1	Mut	0	53.9	1	11.3	1	11.3	0	53.9	0	3						Tx	5	0					5	1.45773
P121	66	female	ADC	G2	T2	N0	M1	S4	Mut	0	1.4	0	1.4					0	4						T1	50	83	338	8.86	0.003
P129	54	female	ADC	G2	T2	N0	M0	S1	Mut	0	36.9	0	36.9	0	36.9	0	36.9	0	5						T2-4	111	94
P132	71	female	ADC	G2	T4	N1	M0	S3	Mut	0	39	1	16.3	1	16.3	0	39	0	4					N class	N0	88	135	343				223	65.0146
P134	64	female	ADC	G2	T2	N1	M0	S2	Mut	0	30.6	1	13.5	1	13.5	1	20.5	0	4						N1	35	22					57	16.6181
P141	71	male	ADC	G2	T1	N0	M0	S1	Mut	0	51.1	1	16.8	1	16.8	0	51.1	0	3						N2	33	14					47	13.7026
P145	73	male	ADC	G3	T2	N1	M0	S2	WT	0	93.7	0	93.7	0	93.7	0	93.7	0	3						N3	2	4					6	1.74927
P146	60	female	ADC	G2	T3	N0	M0	S3	WT	0	121.2	0	121.2	0	121.2	0	121.2	0	4						Nx	8	2					10	2.91545
P149	80	female	ADC	G1	T2	N0	M0	S1	WT	1	14.3	1	14.3	0	14.3	0	14.3	0	4						N0	88	135	333	17.26	<0.001
P151	74	male	ADC	G3	T2	N0	M0	S1	WT	1	14.8	1	14.8	0	14.8	0	14.8	0	4						N1-3	70	40
P156	71	male	ADC	G2	T2	N2	M0	S3	WT	1	20	1	20	0	20	0	20	0	5					M class	M0	147	171	343	8.227	0.004		318	92.7114
P160	65	female	ADC	G3	T2	N1	M0	S2	WT	1	44.8	1	44.8	0	44.8	0	44.8	0	4						M1	19	6					25	7.28863
P161	72	male	ADC	G3	T1	N0	M0	S1	WT	1	66.1	1	66.1	0	66.1	0	66.1	0	4					Clinical stage	S1	67	119	343				186	54.2274
P163	60	male	ADC	G3	T3	N0	M0	S2	WT	1	9.2	1	3.8	1	3.8	0	3.8	0	9						S2	37	30					67	19.5335
P164	75	male	ADC	G3	T4	N0	M0	S3	WT	0	61.1	1	51	0	51	1	51	0	7						S3	43	22					65	18.9504
P166	67	male	ADC	G2	T4	NX	M1	S4	WT	1	4.1	1	4.1					0	3						S4	19	6					25	7.28863
P171	65	male	ADC	G3	T1	N1	M0	S2	WT	0	56.3	0	56.3	0	56.3	0	56.3	0	4						S1	67	119	343	24.92	<0.001
P175	59	male	ADC	G3	T2	N0	M0	S1	WT	0	47.6	1	18.9	0	18.9	0	18.9	0	5						S2+4	99	58
P176	74	female	ADC	G3	T2	N2	M0	S3	WT	0	37.7	0	37.7	0	37.7	0	37.7	0	8					EGFR	WT	109	95	343	5.11	0.024		204	59.4752
P178	53	male	ADC	G2	T2	N2	M0	S3	WT	0	33.8	0	33.8	0	33.8	0	33.8	0	3						Mut	57	82					139	40.5248
P190	81	female	ADC	G1	T1	N2	M0	S3	WT	0	54	0	54	0	54	0	54	0	6
P194	51	female	ADC	G3	T1	N0	M0	S1	WT	1	41	1	12.9	1	12.9	0	12.9	0	3
P196	72	female	ADC	G2	T4	N3	M0	S3	WT	1	20.8	1	16.1	0	16.1	1	16.1	0	6
P197	72	male	ADC	G2	T2	N0	M0	S1	WT	0	48.1	1	15.9	0	15.9	1	15.9	0	3
P198	59	female	ADC	G3	T2	N1	M0	S2	WT	1	50	1	22.9	0	22.9	1	22.9	0	3
P205	79	female	ADC	G3	T3	N3	M0	S3	WT	1	12.3	1	9.5	0	9.5	1	9.5	0	8
P210	71	male	ADC	G3	T2	N1	M0	S2	WT	1	5.7	1	5.7	0	5.7	0	5.7	0	11
P211	61	male	ADC	G3	TX	NX	M1	S4	WT	1	43.1	1	43.1					0	11
P218	76	female	ADC	G2	T3	N2	M0	S3	WT	0	20.3	0	20.3	0	20.3	0	20.3	0	10
P234	41	male	ADC	G3	TX	N1	M1	S4	WT	1	20.2	1	20.2					0	8
P239	88	male	ADC	G2	T1	N0	M0	S1	WT	1	14.7	1	14.7	0	14.7	1	14.7	0	5
P243	66	female	ADC	G3	T3	N1	M0	S3	WT	1	10.5	1	9.1	0	9.1	1	9.1	0	3
P249	73	female	ADC	G3	T2	N2	M0	S3	WT	1	49.9	1	25.7	1	25.7	1	25.7	0	4
P254	65	male	ADC	G1	T2	N2	M0	S3	WT	0	59.5	0	59.5	0	59.5	0	59.5	0	6
P262	64	male	ADC	G3	T4	N2	M0	S3	WT	0	54.8	0	54.8	0	54.8	0	54.8	0	5
P263	66	male	ADC	G3	T1	N0	M0	S1	WT	0	8.1	0	8.1	0	8.1	0	8.1	0	4
P267	59	female	ADC	G1	T1	N1	M0	S2	WT	0	14.2	0	14.2	0	14.2	0	14.2	0	3
P269	77	male	ADC	G2	T3	N0	M0	S2	WT	0	27.1	1	11.5	1	11.5	0	11.5	0	14
P293	70	male	ADC	G3	T2	N1	M0	S2	WT	1	34.9	1	34.9	0	34.9	0	34.9	0	4
P294	62	male	ADC	G3	T2	N0	M0	S1	WT	0	35.7	1	27.3	1	27.3	0	27.3	0	2
P295	61	male	ADC	G2	T2	N1	M0	S2	WT	0	38.3	0	38.3	0	38.3	0	38.3	0	5
P297	54	female	ADC	G2	T2	N0	M0	S2	WT	0	23.4	0	23.4	0	23.4	0	23.4	0	5
P299	61	male	ADC	G2	T2	N0	M0	S1	WT	0	28.7	1	21.2	1	21.2	0	21.2	0	3
P301	59	female	ADC	G1	T1	N2	M0	S3	WT	0	26.8	0	26.8	0	26.8	0	26.8	0	13
P305	62	male	ADC	G2	T3	N0	M0	S2	WT	0	16.4	0	16.4	0	16.4	0	16.4	0	6
P324	75	female	ADC	G1	T1	N0	M0	S1	WT	0	31.2	1	30.6	1	30.6	0	30.6	0	3
P325	76	female	ADC	G2	T1	N0	M0	S1	WT	0	20.6	1	14.2	0	14.2	0	14.2	0	5
P329	61	female	ADC	G2	T1	N0	M0	S1	WT	1	18.3	1	17.5	1	17.5	0	17.5	0	3
P337	75	female	ADC	G2	T2	NX	M1	S4	WT	1	5.6	1	5.6					0	5
P059	36	female	ADC	G2	T3	N2	M0	S3	Mut	0	57	1	6.6	1	6.6	1	30.6	1	5
P080	67	female	ADC	G2	T1	N0	M0	S1	Mut	0	54.6	1	16.1	1	16.1	0	54.6	1	3
P110	63	female	ADC	G2	T1	N0	M0	S1	Mut	0	51	1	11.5	1	11.5	0	51	1	8
P140	69	female	ADC	G2	T3	N1	M0	S3	Mut	0	35.3	0	35.3	0	35.3	0	35.3	1	5
P207	60	male	ADC	G2	T1	N0	M0	S1	WT	1	10.3	1	0.5	0	0.5	1	0.5	1	9
P235	77	female	ADC	G3	T3	N0	M0	S2	WT	0	26.4	1	10.6	0	10.6	1	10.6	1	8
P257	63	male	ADC	G3	T2	N2	M1	S4	WT	0	37.5	0	37.5					1	11
P260	60	male	ADC	G2	T2	N1	M0	S2	WT	0	19.3	0	19.3	0	19.3	0	19.3	1	4
P288	62	male	ADC	G2	T1	N1	M0	S2	WT	0	35	1	34.9	0	34.9	1	34.9	1	3
P319	81	male	ADC	G2	T2	N2	M1	S4	WT	0	18.9	1	14.7					1	5
P001	67	female	ADC	G3	T1	N0	M0	S1	Mut	0	27.5	1	25	1	25	0	27.5	2	9
P007	67	female	ADC	G2	T1	N0	M0	S1	Mut	0	30.8	1	30.8	1	30.8	0	30.8	2	3
P033	70	female	ADC	G2	T1	N0	M0	S1	Mut	0	50	0	50	0	50	0	50	2	2
P035	77	male	ADC	G2	T1	N0	M0	S1	Mut	0	45.8	1	45.7	1	45.7	0	45.8	2	4
P040	71	female	ADC	G2	T1	N0	M0	S1	Mut	0	49.5	0	49.5	0	49.5	0	49.5	2	5
P043	75	female	ADC	G1	T2	N0	M0	S1	Mut	0	49.7	0	49.7	0	49.7	0	49.7	2	2
P047	64	male	ADC	G2	T3	N1	M0	S3	Mut	0	52.8	1	24.6	1	24.6	1	24.6	2	7
P052	68	male	ADC	G2	T3	N1	M1	S4	Mut	0	28.7	1	28.7					2	12
P053	65	female	ADC	G3	T3	N1	M1	S4	Mut	0	8.6	1	6.1					2	10
P088	67	female	ADC	G2	T2	N1	M1	S4	Mut	0	33.2	1	20.2					2	8
P107	52	female	ADC	G2	T4	N0	M0	S3	Mut	0	30.9	1	30.9	1	30.9	0	30.9	2	14
P122	82	female	ADC	G2	T1	N0	M0	S1	Mut	0	4.3	0	4.3	0	4.3	0	4.3	2	4
P158	66	male	ADC	G2	T2	N0	M0	S1	WT	1	7	1	1	0	1	1	1	2	2
P183	49	female	ADC	G3	T3	N0	M0	S2	WT	0	36.6	0	36.6	0	36.6	0	36.6	2	3
P188	61	female	ADC	G2	T2	N1	M0	S2	WT	1	14.3	1	13.9	0	13.9	1	13.9	2	6
P199	74	male	ADC	G1	T2	N2	M0	S3	WT	1	8.3	1	7.1	0	7.1	1	7.1	2	11
P204	71	female	ADC	G3	T2	N0	M0	S1	WT	1	25.9	1	25.9	0	25.9	0	25.9	2	5
P215	53	female	ADC	G2	T1	N2	M0	S3	WT	1	46	1	46	0	46	0	46	2	11
P277	45	female	ADC	G2	T2	N2	M0	S3	WT	1	37.2	1	14	0	14	1	14	2	8
P279	52	female	ADC	G3	T4	N2	M1	S4	WT	1	27.5	1	14.1					2	12
P304	59	male	ADC	G2	T2	N2	M0	S3	WT	0	7.5	0	7.5	0	7.5	0	7.5	2	4
P309	64	male	ADC	G3	TX	NX	M1	S4	WT	0	19.3	1	16.6					2	5
P320	63	male	ADC	G2	T3	N1	M0	S3	WT	1	15.6	1	1.3	0	1.3	1	1.3	2	6
P322	78	female	ADC	G2	T2	N2	M0	S3	WT	0	21.9	0	21.9	0	21.9	0	21.9	2	4
P002	64	female	ADC	G3	T2	N2	M0	S3	Mut	0	30.2	1	10.9	0	30.2	1	10.9	3	12
P049	66	female	ADC	G3	T2	N2	M0	S3	Mut	0	57.5	1	20.1	1	20.1	1	20.1	3	8
P051	64	female	ADC	G3	T2	N2	M0	S3	Mut	0	53.1	1	11.1	1	11.1	0	53.1	3	6
P054	55	female	ADC	G1	T2	N0	M0	S1	Mut	0	47.4	1	11.9	0	47.4	1	11.9	3	13
P055	74	male	ADC	G2	T1	N0	M0	S1	Mut	0	20	0	20	0	20	0	20	3	3
P060	60	female	ADC	G2	T2	N0	M0	S1	Mut	0	49	0	49	0	49	0	49	3	2
P108	51	female	ADC	G2	T1	N0	M0	S1	Mut	0	54.6	1	13.6	1	13.6	0	54.6	3	5
P111	72	male	ADC	G1	T1	N0	M0	S1	Mut	0	45.7	1	16.5	1	16.5	0	45.7	3	8
P131	63	male	ADC	G2	T1	N0	M0	S1	Mut	0	50.1	1	12.1	1	12.1	0	50.1	3	13
P144	73	male	ADC	G3	T4	N1	M1	S4	WT	1	23.9	1	23.9					3	8
P150	75	male	ADC	G1	T2	N0	M0	S1	WT	1	19.6	1	19.6	0	19.6	0	19.6	3	5
P153	76	female	ADC	G2	T2	N0	M0	S1	WT	0	135.6	0	135.6	0	135.6	0	135.6	3	2
P157	80	male	ADC	G2	T1	N2	M0	S3	WT	0	64.2	0	64.2	0	64.2	0	64.2	3	8
P159	83	male	ADC	G1	T1	N0	M0	S1	WT	1	75	1	63.7	1	63.7	0	63.7	3	1
P169	70	female	ADC	G3	T2	N2	M0	S3	WT	0	14.9	0	14.9	0	14.9	0	14.9	3	6
P182	61	male	ADC	G1	T2	N0	M0	S1	WT	0	7.3	0	7.3	0	7.3	0	7.3	3	4
P191	64	female	ADC	G3	T2	N1	M0	S2	WT	0	56.1	0	56.1	0	56.1	0	56.1	3	5
P200	47	male	ADC	G2	T2	N2	M0	S3	WT	1	9.4	1	5.9	0	5.9	1	5.9	3	8
P217	70	female	ADC	G2	T1	N0	M0	S1	WT	0	29.1	1	11.3	0	11.3	1	11.3	3	11
P222	61	female	ADC	G3	T1	N0	M0	S1	WT	1	18.7	1	16	0	16	1	16	3	6
P229	58	male	ADC	G2	T2	N0	M0	S1	WT	0	17.8	1	7.9	1	7.9	0	7.9	3	8
P238	69	male	ADC	G2	T2	N0	M0	S2	WT	0	21	0	21	0	21	0	21	3	2
P248	55	male	ADC	G3	T2	N2	M0	S3	WT	1	14.8	1	14.8	0	14.8	0	14.8	3	10
P258	71	male	ADC	G3	T4	N0	M0	S3	WT	1	2.1	1	2.1	0	2.1	0	2.1	3	8
P265	54	female	ADC	G3	T2	N2	M0	S3	WT	0	6.1	0	6.1	0	6.1	0	6.1	3	12
P272	69	female	ADC	G3	T2	NX	M1	S4	WT	0	4.4	0	4.4					3	4
P273	59	male	ADC	G3	T3	N1	M0	S3	WT	1	30.7	1	12	1	12	0	12	3	13
P283	84	male	ADC	G2	T2	N1	M0	S2	WT	1	8.6	1	8.6	0	8.6	0	8.6	3	5
P289	63	male	ADC	G3	T1	N0	M0	S1	WT	0	2	0	2	0	2	0	2	3	3
P312	71	male	ADC	G2	T2	N1	M0	S2	WT	1	2.9	1	2.9	0	2.9	0	2.9	3	4
P328	74	female	ADC	G2	TX	NX	M1	S4	WT	1	21.9	1	21.9					3	4
P005	63	female	ADC	G2	T1	N0	M0	S1	Mut	0	56	1	22.4	1	22.4	0	56	4	3
P019	55	female	ADC	G2	T2	N0	M0	S1	Mut	0	46.9	0	46.9	0	46.9	0	46.9	4	3
P031	56	male	ADC	G2	T1	N0	M0	S1	Mut	0	10.7	0	10.7	0	10.7	0	10.7	4	3
P041	69	female	ADC	G2	T2	N1	M0	S2	Mut	0	48.2	0	48.2	0	48.2	0	48.2	4	5
P042	57	female	ADC	G3	T1	N0	M0	S1	Mut	0	49.8	0	49.8	0	49.8	0	49.8	4	4
P046	60	male	ADC	G2	T1	N0	M0	S1	Mut	0	49.1	0	49.1	0	49.1	0	49.1	4	3
P056	71	male	ADC	G2	T2	N0	M0	S2	Mut	0	43.2	0	43.2	0	43.2	0	43.2	4	6
P069	76	female	ADC	G3	T1	N0	M0	S1	Mut	0	12.6	0	12.6	0	12.6	0	12.6	4	3
P072	66	female	ADC	G2	T2	N0	M0	S1	Mut	0	48.1	0	48.1	0	48.1	0	48.1	4	1
P078	59	female	ADC	G2	T2	N2	M0	S3	Mut	0	43.8	1	10.5	1	10.5	1	34.5	4	6
P087	55	female	ADC	G2	T2	N0	M0	S1	Mut	0	48	1	32.3	1	32.3	0	48	4	13
P092	50	male	ADC	G2	T2	N0	M0	S1	Mut	0	48.1	1	19.3	1	39.3	1	19.3	4	4
P097	54	female	ADC	G2	T1	N0	M0	S1	Mut	0	44.8	1	13.6	1	13.6	0	44.8	4	9
P143	82	male	ADC	G2	T2	N0	M0	S1	WT	0	24.3	0	24.3	0	24.3	0	24.3	4	4
P147	69	male	ADC	G3	T2	N1	M0	S2	WT	1	9.5	1	9.5	0	9.5	0	9.5	4	4
P148	75	male	ADC	G3	T1	N0	M0	S1	WT	1	43.8	1	43.8	0	43.8	0	43.8	4	3
P152	79	male	ADC	G3	T2	N0	M0	S1	WT	1	0.8	1	0.8	0	0.8	0	0.8	4	13
P162	75	female	ADC	G3	T1	N1	M0	S2	WT	0	82.4	0	82.4	0	82.4	0	82.4	4	3
P189	68	female	ADC	G2	T2	N1	M0	S2	WT	1	33.3	1	23.1	1	23.1	0	23.1	4	3
P192	64	male	ADC	G2	T2	N0	M0	S1	WT	0	74.1	0	74.1	0	74.1	0	74.1	4	5
P212	67	female	ADC	G3	T2	N2	M0	S3	WT	1	15.5	1	15.2	1	15.2	0	15.2	4	9
P224	80	male	ADC	G3	T1	N0	M0	S1	WT	1	19.9	1	18.3	0	18.3	1	18.3	4	3
P225	75	male	ADC	G2	T3	N0	M0	S2	WT	1	5.1	1	4.2	1	4.2	0	4.2	4	8
P227	67	female	ADC	G2	T2	N0	M0	S1	WT	1	24	1	18.9	0	18.9	1	18.9	4	9
P228	76	female	ADC	G2	T2	N0	M0	S2	WT	0	20	1	16.5	0	16.5	1	16.5	4	6
P231	62	male	ADC	G2	T1	N2	M0	S3	WT	0	14.7	0	14.7	0	14.7	0	14.7	4	5
P236	60	male	ADC	G2	TX	N1	M1	S4	WT	1	12.5	1	12.5					4	3
P241	84	male	ADC	G3	T2	N0	M0	S1	WT	0	30.8	0	30.8	0	30.8	0	30.8	4	4
P244	57	female	ADC	G3	T2	N2	M0	S3	WT	0	72.2	1	67.8	0	67.8	1	67.8	4	4
P247	80	female	ADC	G1	T3	N0	M0	S2	WT	0	40.5	1	13.2	1	13.2	0	13.2	4	3
P266	70	female	ADC	G2	T1	N0	M0	S1	WT	0	13.7	0	13.7	0	13.7	0	13.7	4	3
P270	60	female	ADC	G3	T3	N0	M0	S2	WT	0	17.4	0	17.4	0	17.4	0	17.4	4	3
P276	55	female	ADC	G2	T2	N0	M0	S1	WT	0	44.4	0	44.4	0	44.4	0	44.4	4	3
P281	69	female	ADC	G2	T3	N0	M0	S2	WT	1	9.7	1	5.4	1	5.4	0	5.4	4	10
P284	77	male	ADC	G3	T2	NX	M1	S4	WT	1	89.4	1	24.2					4	10
P291	46	male	ADC	G1	T1	N1	M0	S2	WT	0	15.5	0	15.5	0	15.5	0	15.5	4	4
P308	71	male	ADC	G3	T2	NX	M1	S4	WT	0	23.9	0	23.9					4	9
P316	66	female	ADC	G3	T2	N2	M0	S3	WT	0	20.2	1	7.2	0	7.2	1	7.2	4	7
P334	60	male	ADC	G3	T2	N1	M0	S2	WT	0	27.6	0	27.6	0	27.6	0	27.6	4	4
P003	65	female	ADC	G2	T1	N0	M0	S1	Mut	0	5.1	0	5.1	0	5.1	0	5.1	6	3
P004	71	male	ADC	G2	T2	N0	M0	S1	Mut	0	9.4	0	9.4	0	9.4	0	9.4	6	3
P013	65	male	ADC	G1	T1	N0	M0	S1	Mut	0	20.5	0	20.5	0	20.5	0	20.5	6	4
P020	66	female	ADC	G2	T1	N0	M0	S1	Mut	0	29.4	1	28.3	0	29.4	1	28.3	6	8
P025	50	male	ADC	G2	T2	N0	M0	S1	Mut	0	52.4	1	24.1	1	24.1	0	52.4	6	5
P027	72	male	ADC	G2	T2	N0	M0	S1	Mut	0	50.8	0	50.8	0	50.8	0	50.8	6	4
P028	45	female	ADC	G1	T1	N0	M0	S1	Mut	0	59	1	1.3	1	1.3	1	1.3	6	4
P030	43	male	ADC	G2	T2	N0	M0	S1	Mut	0	53.2	1	19.3	0	53.2	1	19.3	6	14
P036	76	female	ADC	G2	T1	N0	M0	S1	Mut	0	41.1	0	41.1	0	41.1	0	41.1	6	2
P037	64	female	ADC	G2	T2	N2	M0	S3	Mut	0	45.3	0	45.3	0	45.3	0	45.3	6	6
P038	44	female	ADC	G2	T2	N0	M0	S1	Mut	0	49.8	0	49.8	0	49.8	0	49.8	6	3
P039	48	female	ADC	G2	T2	N2	M0	S3	Mut	0	55.7	1	13.7	1	13.7	1	13.7	6	13
P045	65	male	ADC	G2	T2	N0	M0	S1	Mut	0	49.7	0	49.7	0	49.7	0	49.7	6	4
P058	72	female	ADC	G2	T1	N0	M0	S1	Mut	0	57.4	1	57.4	0	57.4	1	57.4	6	4
P061	66	male	ADC	G2	T2	N0	M0	S1	Mut	0	54.9	1	13.9	1	13.9	1	34.9	6	3
P064	47	male	ADC	G2	T2	N0	M0	S1	Mut	0	48.8	1	10.7	1	10.7	1	43.7	6	9
P066	55	male	ADC	G2	T2	N1	M1	S4	Mut	0	15.9	1	6.5					6	10
P073	33	male	ADC	G2	T1	N0	M0	S1	Mut	0	42.8	0	42.8	0	42.8	0	42.8	6	3
P076	55	male	ADC	G1	T1	N0	M0	S1	Mut	0	29	0	29	0	29	0	29	6	3
P077	43	female	ADC	G1	T1	N0	M0	S1	Mut	0	11.5	0	11.5	0	11.5	0	11.5	6	1
P079	56	male	ADC	G1	T1	N0	M0	S1	Mut	0	55.2	1	55.2	1	55.2	0	55.2	6	4
P086	34	female	ADC	G3	T2	N1	M0	S2	Mut	0	42.7	0	42.7	0	42.7	0	42.7	6	5
P089	47	female	ADC	G2	T1	N0	M0	S1	Mut	0	40.8	0	40.8	0	40.8	0	40.8	6	4
P091	69	male	ADC	G1	T1	N0	M0	S1	Mut	0	53.3	1	11.8	1	11.8	0	53.3	6	9
P095	52	female	ADC	G2	T1	N0	M0	S1	Mut	0	42.4	0	42.4	0	42.4	0	42.4	6	2
P099	65	male	ADC	G1	T1	N0	M0	S1	Mut	0	32.9	0	32.9	0	32.9	0	32.9	6	2
P103	59	male	ADC	G2	T1	N3	M0	S3	Mut	0	40.8	0	40.8	0	40.8	0	40.8	6	6
P106	47	female	ADC	G2	T4	N1	M0	S3	Mut	0	41.4	0	41.4	0	41.4	0	41.4	6	9
P109	57	male	ADC	G2	T1	N0	M0	S1	Mut	0	44.9	0	44.9	0	44.9	0	44.9	6	3
P116	63	male	ADC	G2	T1	N0	M0	S1	Mut	0	44.5	0	44.5	0	44.5	0	44.5	6	2
P125	65	male	ADC	G2	T4	N0	M0	S3	Mut	0	32.3	0	32.3	0	32.3	0	32.3	6	7
P130	65	female	ADC	G1	T1	N0	M0	S1	Mut	0	2.1	0	2.1	0	2.1	0	2.1	6	1
P135	59	female	ADC	G2	T1	N0	M0	S1	Mut	0	40.8	0	40.8	0	40.8	0	40.8	6	4
P136	52	female	ADC	G2	T2	N1	M0	S2	Mut	0	34.6	1	32.7	1	32.7	0	34.6	6	2
P138	71	male	ADC	G2	T1	N0	M1	S4	Mut	0	58.4	1	58.4					6	9
P142	65	female	ADC	G2	T2	N1	M0	S2	WT	0	26.4	0	26.4	0	26.4	0	26.4	6	5
P154	57	male	ADC	G2	T2	N2	M0	S3	WT	1	14.3	1	5.6	1	5.6	0	5.6	6	10
P165	83	female	ADC	G2	T2	N1	M0	S2	WT	0	39.9	0	39.9	0	39.9	0	39.9	6	4
P168	53	male	ADC	G2	T3	N0	M0	S2	WT	1	38.1	1	31.5	0	31.5	1	31.5	6	3
P172	69	female	ADC	G2	T2	N1	M0	S2	WT	0	25.2	0	25.2	0	25.2	0	25.2	6	2
P180	56	female	ADC	G2	T1	N2	M0	S3	WT	0	21.9	0	21.9	0	21.9	0	21.9	6	10
P181	72	male	ADC	G2	T2	N0	M0	S1	WT	0	19.7	1	8.4	1	8.4	0	8.4	6	16
P184	52	female	ADC	G3	T1	N0	M0	S1	WT	0	24	0	24	0	24	0	24	6	3
P185	73	female	ADC	G3	T2	N0	M0	S1	WT	0	16.2	1	14.6	0	14.6	0	14.6	6	8
P187	73	male	ADC	G2	T1	N0	M0	S1	WT	0	13.8	0	13.8	0	13.8	0	13.8	6	2
P193	51	male	ADC	G3	T2	N2	M0	S3	WT	1	29.3	1	29.3	0	29.3	0	29.3	6	9
P195	52	female	ADC	G3	T1	N0	M0	S1	WT	1	10	1	8.4	0	8.4	1	8.4	6	11
P202	72	male	ADC	G3	T4	N3	M0	S3	WT	1	79.8	1	79.8	0	79.8	0	79.8	6	8
P208	63	male	ADC	G2	T2	N1	M0	S2	WT	0	35.7	0	35.7	0	35.7	0	35.7	6	3
P209	55	male	ADC	G1	T2	N1	M0	S2	WT	0	68.8	0	68.8	0	68.8	0	68.8	6	5
P213	72	male	ADC	G2	T2	N0	M0	S1	WT	1	54.4	1	54.4	0	54.4	0	54.4	6	3
P214	56	male	ADC	G1	T1	N0	M0	S1	WT	0	70.3	0	70.3	0	70.3	0	70.3	6	2
P223	64	male	ADC	G3	T1	N0	M0	S1	WT	0	30.1	0	30.1	0	30.1	0	30.1	6	3
P240	69	male	ADC	G2	T1	N0	M0	S1	WT	0	18.5	0	18.5	0	18.5	0	18.5	6	3
P245	64	male	ADC	G3	T2	N1	M0	S2	WT	0	86.3	0	86.3	0	86.3	0	86.3	6	5
P251	64	male	ADC	G3	T2	N1	M0	S2	WT	0	41.5	0	41.5	0	41.5	0	41.5	6	6
P261	57	male	ADC	G1	T1	N0	M0	S1	WT	0	40.6	0	40.6	0	40.6	0	40.6	6	2
P264	84	male	ADC	G2	T2	N0	M0	S1	WT	0	6.2	0	6.2	0	6.2	0	6.2	6	3
P268	71	male	ADC	G2	T1	N0	M0	S1	WT	0	4.3	0	4.3	0	4.3	0	4.3	6	4
P271	80	female	ADC	G3	T2	N0	M0	S1	WT	1	53.3	1	53.3	0	53.3	0	53.3	6	4
P274	58	female	ADC	G2	T1	N0	M0	S1	WT	0	39.6	0	39.6	0	39.6	0	39.6	6	3
P275	41	male	ADC	G2	T3	N0	M0	S2	WT	1	11.3	1	3.6	1	3.6	0	3.6	6	3
P278	64	male	ADC	G3	T3	N1	M0	S3	WT	1	55.2	1	42.6	1	42.6	0	42.6	6	7
P280	62	male	ADC	G2	T4	N1	M1	S4	WT	1	32.5	1	32.5					6	13
P282	60	male	ADC	G1	T2	N0	M0	S1	WT	0	241.6	0	241.6	0	241.6	0	241.6	6	3
P287	62	male	ADC	G2	T1	N0	M0	S1	WT	0	25.5	0	25.5	0	25.5	0	25.5	6	3
P303	59	female	ADC	G2	T1	N0	M0	S1	WT	0	12.4	0	12.4	0	12.4	0	12.4	6	3
P306	76	female	ADC	G2	T1	N0	M0	S1	WT	0	1.2	0	1.2	0	1.2	0	1.2	6	3
P307	45	female	ADC	G2	T2	N1	M0	S2	WT	0	2.7	0	2.7	0	2.7	0	2.7	6	3
P311	64	male	ADC	G2	T3	N0	M0	S2	WT	0	4.1	0	4.1	0	4.1	0	4.1	6	3
P314	42	female	ADC	G3	T2	N0	M0	S1	WT	0	15.9	0	15.9	0	15.9	0	15.9	6	3
P318	65	male	ADC	G3	T2	N0	M0	S1	WT	0	18.8	0	18.8	0	18.8	0	18.8	6	2
P330	48	female	ADC	G2	T1	N0	M0	S1	WT	0	19.3	0	19.3	0	19.3	0	19.3	6	2
P331	40	female	ADC	G2	T3	N3	M1	S4	WT	1	1.9	1	1.6					6	7
P332	56	male	ADC	G3	T2	N1	M0	S2	WT	0	22.1	0	22.1	0	22.1	0	22.1	6	5
P338	77	male	ADC	G2	T1	N2	M0	S3	WT	1	2.5	1	2.5	0	2.5	0	2.5	6	5
P344	49	male	ADC	G3	T4	N2	M0	S3	WT	0	20.6	0	20.6	0	20.6	0	20.6	6	6
P345	68	female	ADC	G3	T1	N0	M0	S1	WT	0	17.1	0	17.1	0	17.1	0	17.1	6	4
P009	66	female	ADC	G2	T1	N0	M0	S1	Mut	0	7.8	0	7.8	0	7.8	0	7.8	8	2
P017	64	female	ADC	G2	T1	N1	M0	S2	Mut	0	42	1	23.3	1	23.3	0	42	8	5
P023	61	female	ADC	G2	T2	N0	M0	S1	Mut	0	51.1	0	51.1	0	51.1	0	51.1	8	2
P094	60	female	ADC	G2	T1	N0	M0	S1	Mut	0	35.3	1	22.9	1	22.9	0	35.3	8	3
P098	72	female	ADC	G2	T1	N0	M0	S1	Mut	0	32.7	0	32.7	0	32.7	0	32.7	8	3
P124	55	female	ADC	G2	T1	N0	M0	S1	Mut	0	35.6	0	35.6	0	35.6	0	35.6	8	4
P128	49	female	ADC	G2	T2	N0	M0	S1	Mut	0	52.3	1	31	1	31	1	31	8	4
P174	66	male	ADC	G3	T2	N0	M0	S2	WT	0	11.8	0	11.8	0	11.8	0	11.8	8	4
P221	72	female	ADC	G3	T1	N0	M0	S1	WT	0	21.7	0	21.7	0	21.7	0	21.7	8	2
P230	54	male	ADC	G2	T2	N0	M0	S1	WT	0	15.9	0	15.9	0	15.9	0	15.9	8	1
P232	62	female	ADC	G3	T3	N0	M0	S2	WT	0	0.4	0	0.4	0	0.4	0	0.4	8	4
P237	63	female	ADC	G2	T1	N1	M0	S2	WT	0	23	1	20.5	0	20.5	0	20.5	8	5
P242	74	male	ADC	G3	T2	N0	M0	S1	WT	0	17	0	17	0	17	0	17	8	2
P250	65	female	ADC	G3	T2	N0	M0	S1	WT	1	48.5	1	31.4	1	31.4	0	31.4	8	1
P290	67	male	ADC	G2	T2	N0	M0	S1	WT	0	20	0	20	0	20	0	20	8	5
P339	71	male	ADC	G2	T2	N2	M0	S3	WT	1	10.2	1	7.5	1	7.5	0	7.5	8	13
P341	68	female	ADC	G2	T2	N0	M0	S1	WT	0	58.1	1	2.3	0	2.3	0	2.3	8	9
P006	73	female	ADC	G3	T2	N2	M0	S3	Mut	0	21.9	1	21.3	1	21.3	0	21.9	9	12
P008	70	female	ADC	G2	T1	N0	M0	S1	Mut	0	5.1	0	5.1	0	5.1	0	5.1	9	3
P010	66	male	ADC	G3	T1	N0	M0	S1	Mut	0	4.1	0	4.1	0	4.1	0	4.1	9	4
P011	61	male	ADC	G2	T1	N0	M0	S1	Mut	0	0.4	0	0.4	0	0.4	0	0.4	9	1
P012	44	female	ADC	G2	T1	N0	M0	S1	Mut	0	49.5	0	49.5	0	49.5	0	49.5	9	2
P014	59	female	ADC	G2	T1	N0	M0	S1	Mut	0	40.6	0	40.6	0	40.6	0	40.6	9	4
P015	55	female	ADC	G1	T1	N0	M0	S1	Mut	0	40.2	0	40.2	0	40.2	0	40.2	9	1
P018	62	male	ADC	G3	T1	N0	M0	S1	Mut	0	32.2	0	32.2	0	32.2	0	32.2	9	4
P022	74	female	ADC	G1	T2	N0	M0	S1	Mut	0	15.8	0	15.8	0	15.8	0	15.8	9	1
P044	74	male	ADC	G2	T2	N0	M0	S1	Mut	0	19.5	0	19.5	0	19.5	0	19.5	9	2
P062	62	female	ADC	G2	T1	N0	M0	S1	Mut	0	49.3	0	49.3	0	49.3	0	49.3	9	5
P067	63	female	ADC	G2	T1	N0	M0	S1	Mut	0	1.1	0	1.1	0	1.1	0	1.1	9	2
P071	42	female	ADC	G2	T3	N0	M0	S2	Mut	0	43.2	0	43.2	0	43.2	0	43.2	9	2
P082	55	male	ADC	G2	T1	N1	M0	S2	Mut	0	17.3	1	10.3	1	10.3	1	10.3	9	2
P083	77	female	ADC	G2	T1	N0	M0	S1	Mut	1	39.7	1	33.7	1	33.7	0	33.7	9	4
P084	69	male	ADC	G2	T2	N0	M0	S1	Mut	0	47.3	0	47.3	0	47.3	0	47.3	9	4
P085	68	male	ADC	G2	T2	N0	M0	S1	Mut	0	23.7	0	23.7	0	23.7	0	23.7	9	3
P090	66	female	ADC	G2	T2	N0	M0	S1	Mut	0	46.6	0	46.6	0	46.6	0	46.6	9	4
P096	48	female	ADC	G2	T1	N0	M0	S1	Mut	0	40.2	0	40.2	0	40.2	0	40.2	9	3
P105	64	male	ADC	G1	T1	N0	M0	S1	Mut	0	40.4	0	40.4	0	40.4	0	40.4	9	3
P112	50	male	ADC	G2	T2	N0	M0	S1	Mut	0	28.1	0	28.1	0	28.1	0	28.1	9	3
P113	68	male	ADC	G3	T1	N0	M0	S1	Mut	0	31.7	0	31.7	0	31.7	0	31.7	9	4
P114	46	female	ADC	G1	T1	N0	M0	S1	Mut	0	49.6	1	12	1	12	0	49.6	9	3
P118	62	female	ADC	G2	T2	N0	M0	S1	Mut	0	43.4	0	43.4	0	43.4	0	43.4	9	1
P126	68	female	ADC	G2	T1	N2	M0	S3	Mut	0	40.2	0	40.2	0	40.2	0	40.2	9	7
P127	57	female	ADC	G2	T1	N0	M0	S1	Mut	0	0.4	0	0.4	0	0.4	0	0.4	9	4
P133	71	female	ADC	G2	T2	N0	M0	S1	Mut	0	21.9	0	21.9	0	21.9	0	21.9	9	3
P137	70	female	ADC	G2	T1	N0	M0	S1	Mut	0	23.3	0	23.3	0	23.3	0	23.3	9	4
P139	69	female	ADC	G1	T1	N0	M0	S1	Mut	0	41.4	1	41.1	1	41.1	0	41.4	9	6
P155	63	female	ADC	G3	T2	N0	M0	S1	WT	1	55.2	1	55.2	0	55.2	0	55.2	9	5
P167	80	male	ADC	G2	T3	N0	M0	S2	WT	0	34.4	0	34.4	0	34.4	0	34.4	9	4
P170	75	male	ADC	G3	T4	N1	M0	S3	WT	1	1.7	1	1.7	0	1.7	0	1.7	9	4
P179	64	male	ADC	G2	T3	N0	M0	S2	WT	0	24.3	1	21	1	21	0	21	9	5
P186	73	female	ADC	G3	T1	N0	M0	S1	WT	0	11.7	0	11.7	0	11.7	0	11.7	9	3
P201	75	female	ADC	G1	T2	N0	M0	S1	WT	1	14.5	1	14.2	0	14.2	1	14.2	9	3
P206	74	female	ADC	G2	T2	N2	M0	S3	WT	1	6.3	1	6.1	0	6.1	1	6.1	9	4
P216	58	female	ADC	G2	T2	N0	M0	S1	WT	0	41.1	0	41.1	0	41.1	0	41.1	9	2
P220	54	male	ADC	G3	T2	N0	M0	S1	WT	0	22.3	0	22.3	0	22.3	0	22.3	9	1
P226	51	male	ADC	G2	T2	NX	M1	S4	WT	0	18	0	18					9	11
P259	61	male	ADC	G2	T2	N2	M0	S3	WT	0	28.8	1	26.5	0	26.5	1	26.5	9	13
P286	59	female	ADC	G3	T1	N0	M0	S1	WT	0	27.5	0	27.5	0	27.5	0	27.5	9	1
P292	66	male	ADC	G3	T2	NX	M1	S4	WT	0	31.6	1	14.1					9	11
P296	42	male	ADC	G2	T1	N0	M0	S1	WT	0	33.1	0	33.1	0	33.1	0	33.1	9	2
P298	59	male	ADC	G2	T3	N0	M0	S2	WT	1	0.6	1	0.6	0	0.6	0	0.6	9	8
P300	50	male	ADC	G2	T2	N1	M0	S2	WT	0	26.9	1	11.1	1	11.1	0	11.1	9	5
P302	52	female	ADC	G2	T2	N0	M0	S1	WT	0	13.9	0	13.9	0	13.9	0	13.9	9	4
P310	49	male	ADC	G3	T1	N0	M0	S1	WT	0	17.5	0	17.5	0	17.5	0	17.5	9	3
P317	83	female	ADC	G3	T2	N2	M0	S3	WT	0	25.8	0	25.8	0	25.8	0	25.8	9	11
P321	72	male	ADC	G2	T1	N0	M0	S1	WT	0	14.5	0	14.5	0	14.5	0	14.5	9	1
P326	74	female	ADC	G2	T4	N0	M0	S3	WT	0	24.9	0	24.9	0	24.9	0	24.9	9	14
P327	72	female	ADC	G2	T3	N3	M0	S3	WT	0	35.3	0	35.3	0	35.3	0	35.3	9	9
P333	64	female	ADC	G3	T2	N0	M0	S1	WT	0	15.9	0	15.9	0	15.9	0	15.9	9	5
P336	76	female	ADC	G1	T1	N2	M0	S3	WT	1	59.7	1	59.7	0	59.7	0	59.7	9	11
P024	67	male	ADC	G1	T2	N0	M0	S2	Mut	0	51.1	0	51.1	0	51.1	0	51.1	12	4
P050	62	female	ADC	G2	T1	N0	M0	S1	Mut	0	55.9	1	12.4	1	12.4	0	55.9	12	12
P065	56	female	ADC	G2	T1	N0	M0	S1	Mut	0	37.7	0	37.7	0	37.7	0	37.7	12	5
P068	69	female	ADC	G3	T2	N0	M0	S1	Mut	0	16.9	1	16.9	1	16.9	0	16.9	12	2
P070	79	male	ADC	G2	T1	N0	M0	S1	Mut	0	35.2	0	35.2	0	35.2	0	35.2	12	5
P075	77	male	ADC	G1	T1	N0	M0	S1	Mut	0	44.9	0	44.9	0	44.9	0	44.9	12	4
P093	65	female	ADC	G2	T1	N0	M0	S1	Mut	0	45.8	0	45.8	0	45.8	0	45.8	12	3
P101	50	female	ADC	G2	T2	N0	M0	S1	Mut	0	45.3	0	45.3	0	45.3	0	45.3	12	3
P102	68	female	ADC	G1	T1	N0	M0	S1	Mut	0	39.7	1	12.1	1	12.1	0	39.7	12	3
P115	37	male	ADC	G2	T1	N0	M0	S1	Mut	0	44.8	0	44.8	0	44.8	0	44.8	12	4
P123	46	male	ADC	G2	T1	N0	M0	S1	Mut	0	28.9	0	28.9	0	28.9	0	28.9	12	3
P173	68	female	ADC	G2	T1	N0	M0	S1	WT	0	7.9	0	7.9	0	7.9	0	7.9	12	1
P177	77	female	ADC	G2	T1	N0	M0	S1	WT	0	38.8	0	38.8	0	38.8	0	38.8	12	1
P203	72	female	ADC	G3	T2	N0	M0	S1	WT	1	42.9	1	42.9	0	42.9	0	42.9	12	2
P219	60	male	ADC	G1	T1	N0	M0	S1	WT	0	27.5	0	27.5	0	27.5	0	27.5	12	5
P233	60	female	ADC	G3	T2	N1	M0	S2	WT	0	20.6	0	20.6	0	20.6	0	20.6	12	3
P246	74	female	ADC	G2	T2	N0	M0	S1	WT	0	36.4	0	36.4	0	36.4	0	36.4	12	2
P252	59	male	ADC	G1	T2	N0	M0	S2	WT	0	53.4	0	53.4	0	53.4	0	53.4	12	2
P253	56	female	ADC	G1	T1	N0	M0	S1	WT	0	69.1	0	69.1	0	69.1	0	69.1	12	5
P255	78	male	ADC	G1	T2	N0	M0	S1	WT	0	79.4	0	79.4	0	79.4	0	79.4	12	3
P256	76	male	ADC	G3	T2	N0	M0	S1	WT	0	54.6	0	54.6	0	54.6	0	54.6	12	2
P285	58	female	ADC	G2	T3	N0	M0	S2	WT	1	40.3	1	24	1	24	0	24	12	4
P313	67	male	ADC	G1	T1	N0	M0	S1	WT	0	15.9	0	15.9	0	15.9	0	15.9	12	5
P315	62	female	ADC	G3	T2	N1	M0	S2	WT	0	18.4	0	18.4	0	18.4	0	18.4	12	4
P323	81	male	ADC	G2	T2	N0	M0	S1	WT	0	20.5	0	20.5	0	20.5	0	20.5	12	3
P335	57	male	ADC	G2	T1	N0	M0	S1	WT	0	39.2	0	39.2	0	39.2	0	39.2	12	3
P340	58	female	ADC	G2	T2	N0	M0	S2	WT	1	11.2	1	6.5	0	6.5	1	6.5	12	9
P342	52	male	ADC	G3	T2	N0	M0	S1	WT	0	1.7	0	1.7	0	1.7	0	1.7	12	4
P343	69	female	ADC	G3	T1	N0	M0	S1	WT	0	47.7	0	47.7	0	47.7	0	47.7	12	3
